# Supplementary material for: Synergistic effects of Fe-substitutional-doping and a surface close-contact Fe2O3/CeO2 heterojunction in Fe/CeO2 for enhanced CH4 photocatalytic conversion
Source: Royal Society of Chemistry journal article supplement (doi:10.1039/d3ta00720k), 2023-01-01
Supplement: d3ta00720k1.pdf [file d3ta00720k1.pdf]

**Synergistic effects of Fe-substitutional-doping and surface close-contact Fe<sub>2</sub>O<sub>3</sub>/CeO<sub>2</sub> heterojunction in Fe/CeO<sub>2</sub> for enhanced CH<sub>4</sub> photocatalytic conversion**

*Hailong Tang<sup>a</sup>, Meiling Wang<sup>a,\*</sup>, Yongqing Ma<sup>a,b</sup>, Xiao Sun<sup>c</sup>, Min Wang<sup>d,\*</sup> and*

*Ganhong Zheng<sup>a</sup>*

*<sup>a</sup>School of Materials Science and Engineering, Anhui University, Hefei, 230601, China*

*<sup>b</sup>Institute of Physical Science and Information Technology, Anhui University, Hefei 230601, China*

*<sup>c</sup>Hefei National Laboratory for Physical Sciences at the Microscale, Key Laboratory of Surface and Interface Chemistry and Energy Catalysis of Anhui Higher Education Institutes, School of Chemistry and Materials Science, University of Science and Technology of China, Hefei 230026, China.*

*<sup>d</sup>School of Physics and optoelectronics engineering, Anhui University, Hefei, 230601, China*

*\*To whom correspondence should be addressed.*

Tel: (86) 13856996630, E-mail: [mlw@ahu.edu.cn](mailto:mlw@ahu.edu.cn), [ahwm@ahu.edu.cn](mailto:ahwm@ahu.edu.cn)

**Key words:** CeO<sub>2</sub>, Fe-substitutional-doping, Fe<sub>2</sub>O<sub>3</sub>/CeO<sub>2</sub> heterojunction, photocatalysis, CH<sub>4</sub> conversion

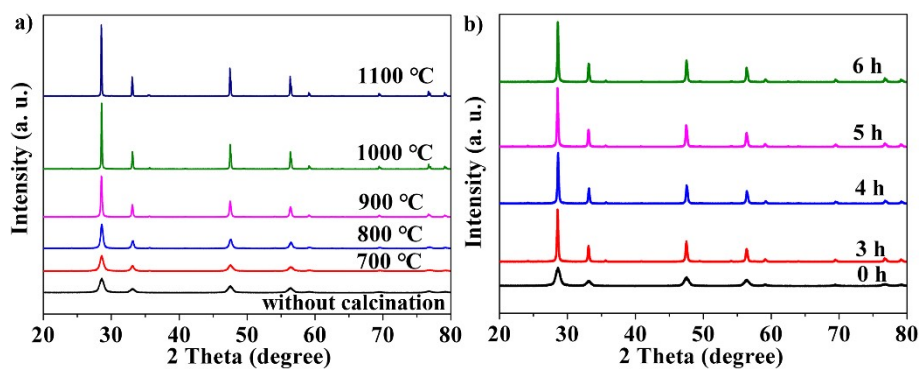

Fig. S1 XRD spectra of 1:3 Fe/CeO<sub>2</sub> calculated under varied a) temperature and b) time.

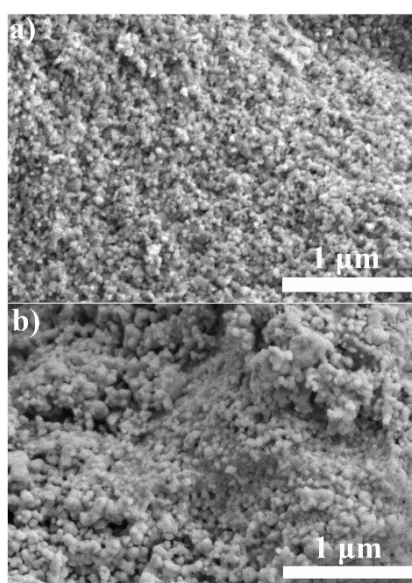

Fig. S2 a) SEM images of CeO<sub>2</sub>-900/6 and b) 1:3 Fe/CeO<sub>2</sub>-900/6 before pickling.

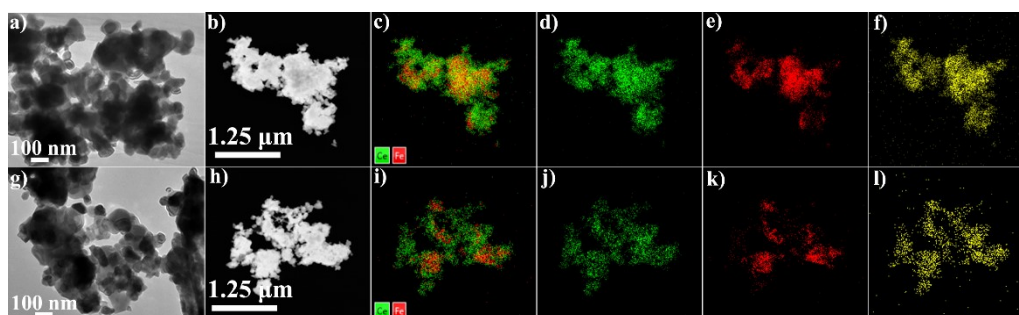

Fig. S3 TEM, STEM and EDS mapping images of 1:3 Fe/CeO<sub>2</sub>-900/6 a-f) before and g-l) after pickling respectively.

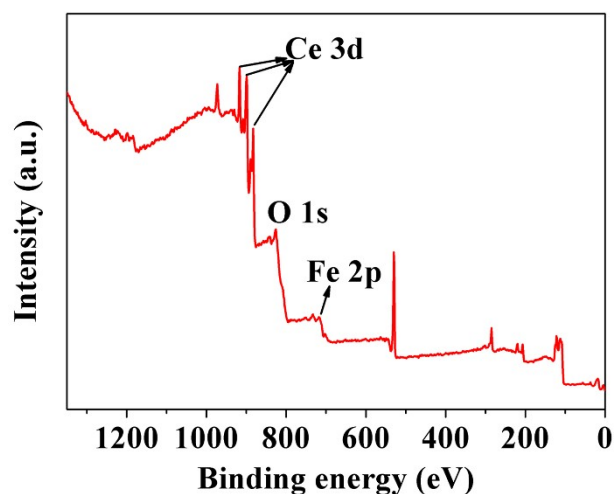

Fig.S4 XPS survey spectrum of 1:3 Fe/CeO<sub>2</sub>-900/6.

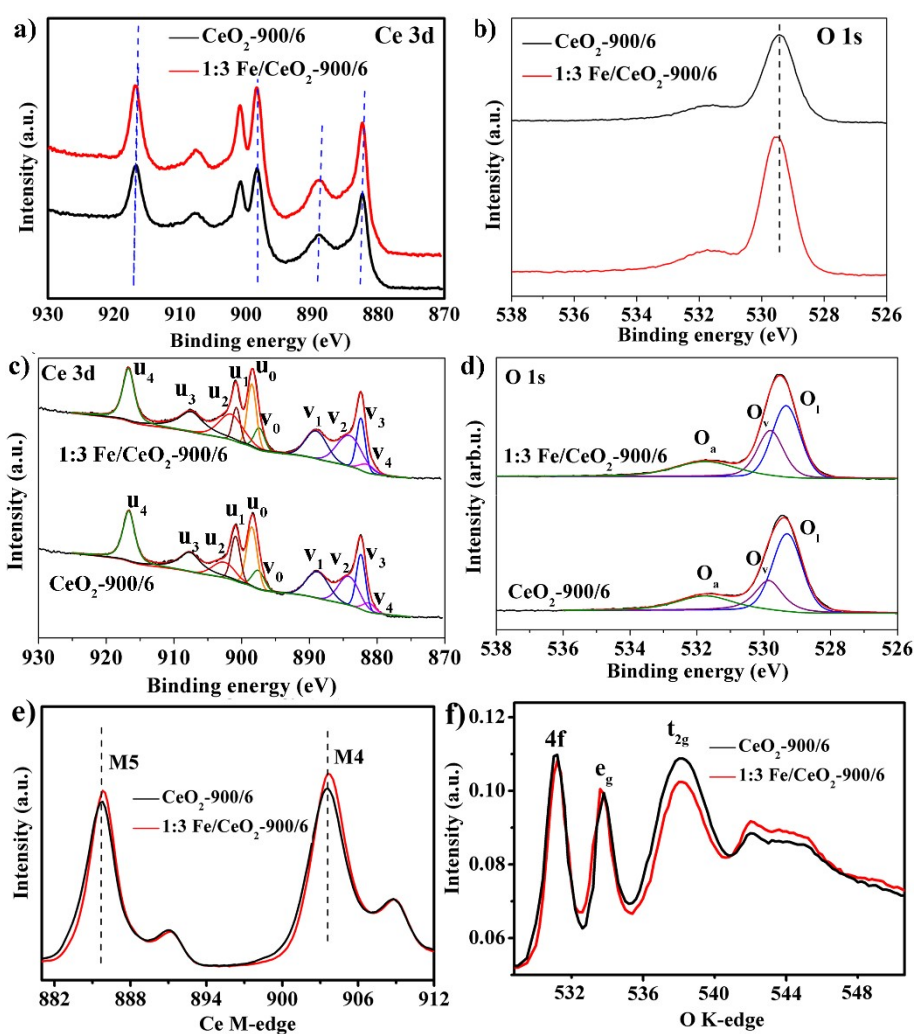

Fig. S5 a, b) High-resolution Ce 3d and O 1s XPS spectra of 1:3 Fe/CeO<sub>2</sub>-900/6. c, d) Deconvoluted Ce 3d and O 1s XPS spectra of 1:3 Fe/CeO<sub>2</sub>-900/6 and CeO<sub>2</sub>-900/6 respectively. e, f) Ce M-edge and O K-edge XANES spectra of 1:3 Fe/CeO<sub>2</sub>-900/6.

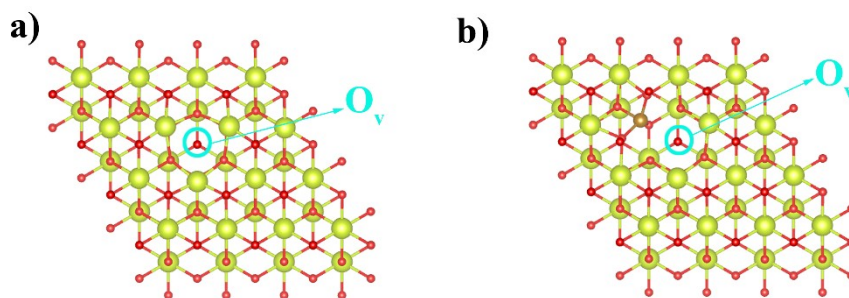

Fig. S6 Model structures of  $\text{CeO}_2$  and Fe-substituted  $\text{CeO}_2$  with  $\text{O}_v$ .

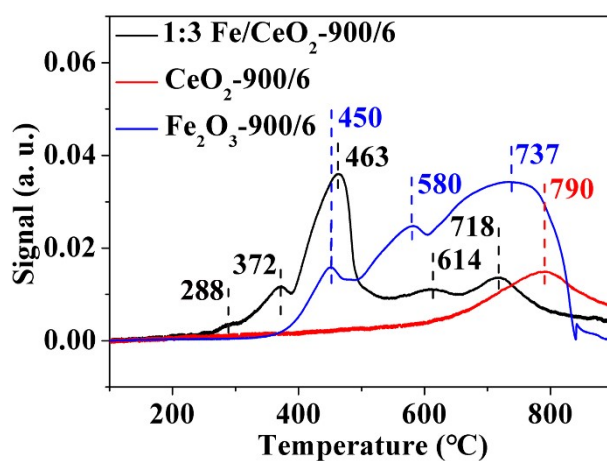

Fig. S7  $\text{H}_2$ -TPR profiles of varied catalysts.

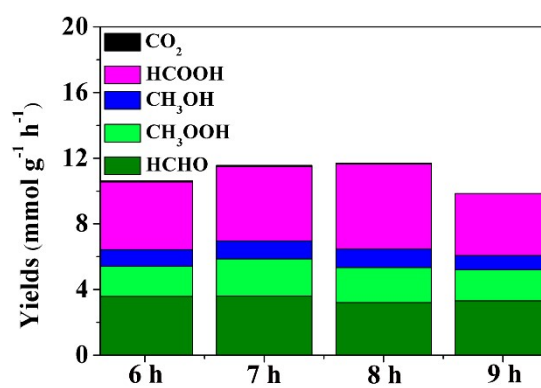

Fig. S8 Product yields over catalysts with prolonged calcination time.

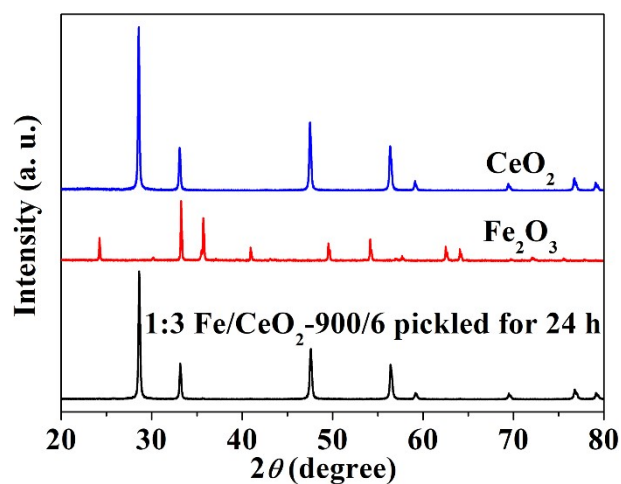

Fig. S9 XRD spectra of  $\text{CeO}_2$ ,  $\text{Fe}_2\text{O}_3$  and 1:3  $\text{Fe}/\text{CeO}_2$ -900/6 pickled with pure hydrochloric acid solution for 24 h respectively.

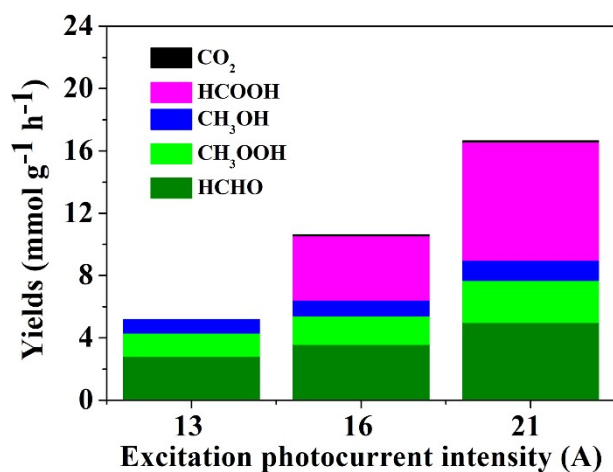

Fig. S10 Yields of C1 products using different light intensity.

Table S1 Products yields of 1:3  $\text{Fe}/\text{CeO}_2$ -900/6 with HCl pickling time of 24 h.

| Products                                                             | $\text{CH}_3\text{OH}$ | HCHO    | HCOOH   | $\text{CH}_3\text{OOH}$ | $\text{CO}_2$ | Total   |
|----------------------------------------------------------------------|------------------------|---------|---------|-------------------------|---------------|---------|
| Yields<br>(mmol<br>$\text{g}_{\text{cat.}}^{-1} \text{h}^{-1}$<br>1) | 0.66007                | 4.21538 | 0.74198 | 1.42045                 | 0.01496       | 7.05284 |

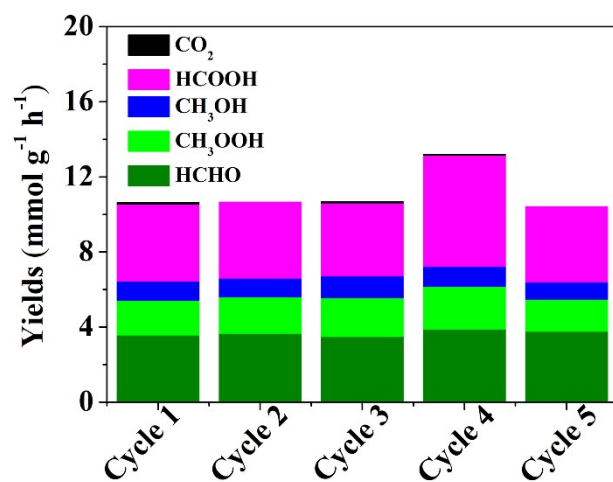

Fig. S11 Cycling tests of CH<sub>4</sub> conversion over 1:3 Fe/CeO<sub>2</sub>-900/6.

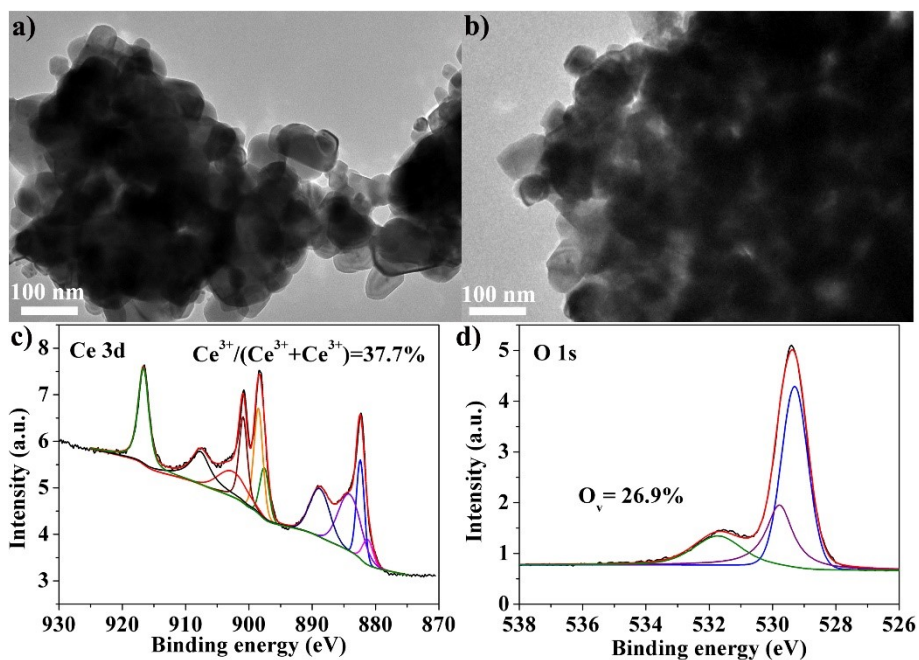

Fig. S12 a, b) TEM images of 1:3 Fe/CeO<sub>2</sub>-900/6 before and after photocatalytic experiment, and c, d) deconvoluted high-resolution Ce 3d and O1s XPS spectra of 1:3 Fe/CeO<sub>2</sub>-900/6 after illumination.



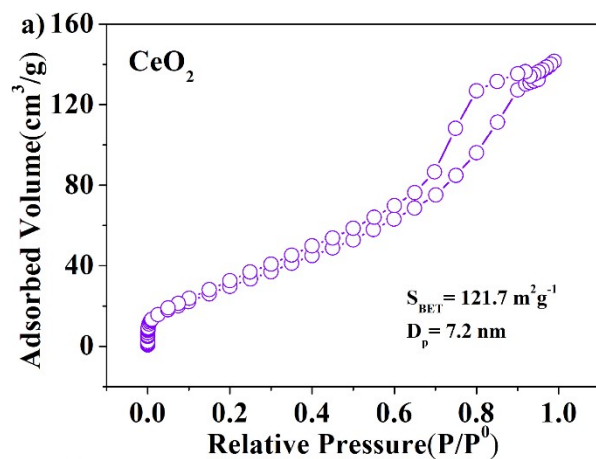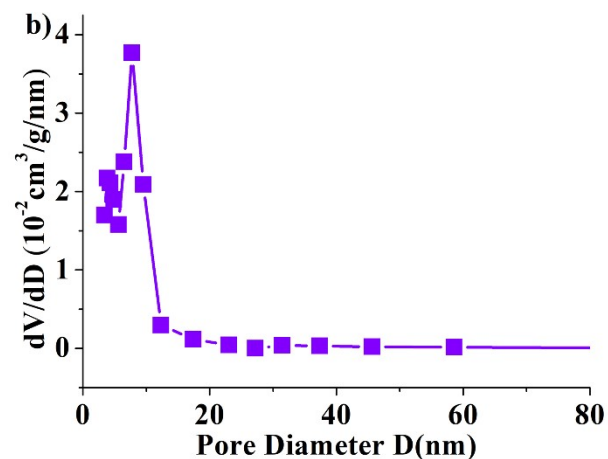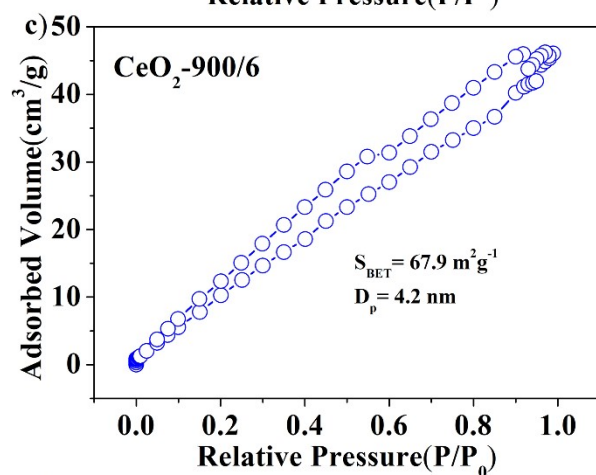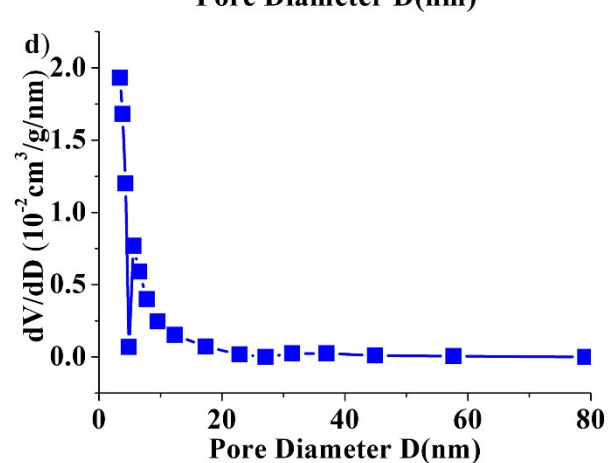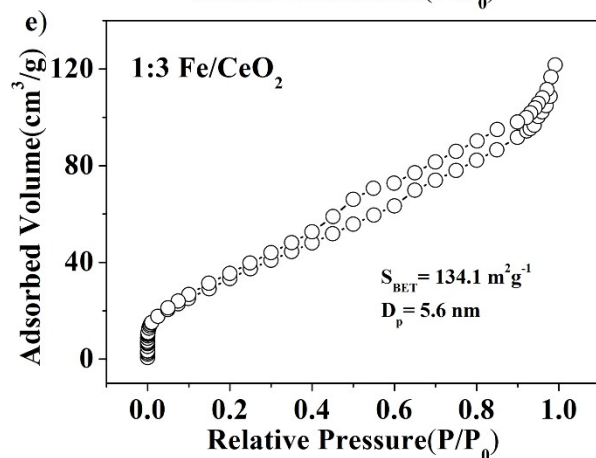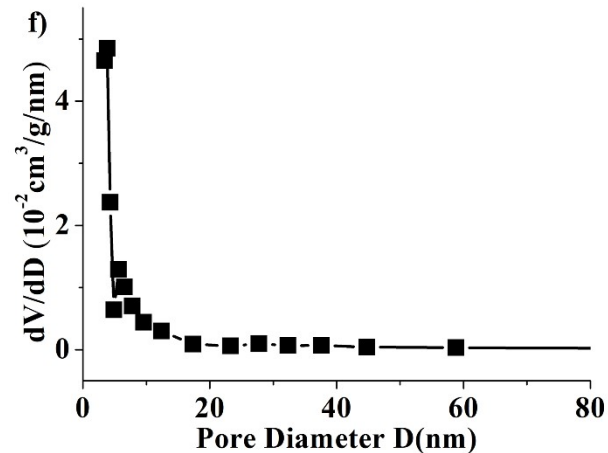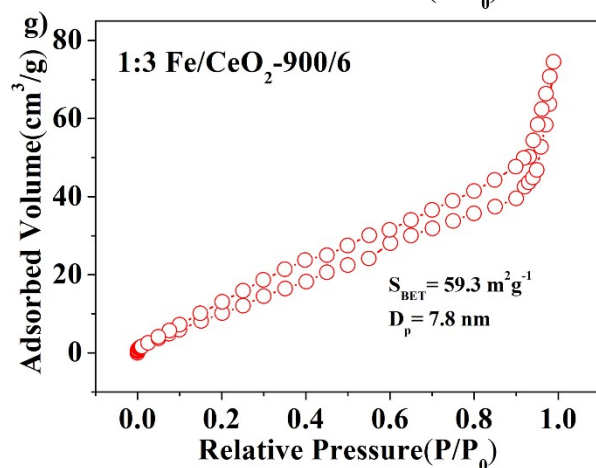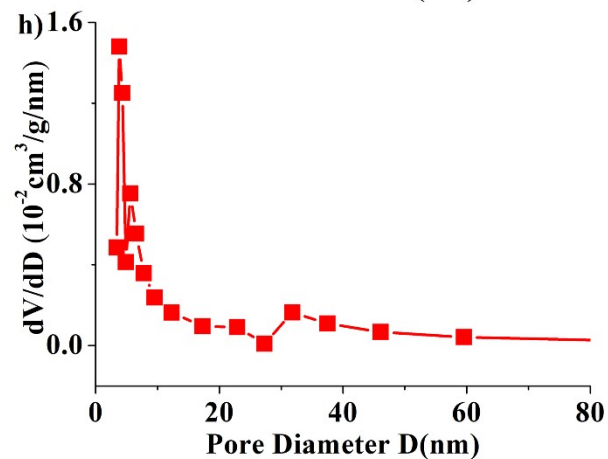

Fig. S13 The N<sub>2</sub> adsorption–desorption isotherms and corresponding pore size distribution curves for a, b) CeO<sub>2</sub>, c, d) CeO<sub>2</sub>-900/6, e, f) 1:3 Fe/CeO<sub>2</sub> and g, h) 1:3 Fe/CeO<sub>2</sub>-900/6 respectively.

Table S2 Calculated Hirshfeld charge for the CeO<sub>2</sub> and \* slabs respectively.

| Models           | Hirshfeld Charge |        |       |
|------------------|------------------|--------|-------|
|                  | Ce               | O      | Fe    |
| CeO <sub>2</sub> | 0.639            | -0.349 | /     |
| *                | 0.637            | -0.248 | 0.453 |

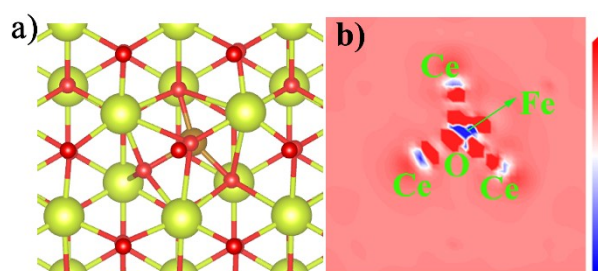

Fig. S14 a) Optimized structure and b) DCD maps of the Fe-interstitial-doped CeO<sub>2</sub> slab, plotted from -0.05 (blue) to 0.15 e Å<sup>-3</sup> (red).



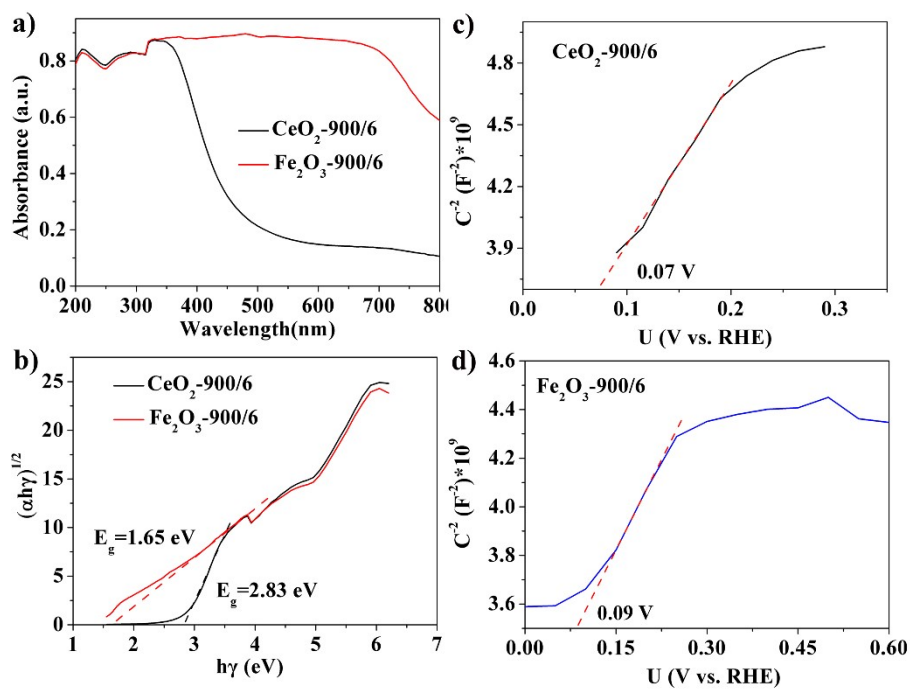

Fig. S15 a) UV-vis DRS spectra and b) bandgaps determined using  $[\text{A}h\nu]^{1/2}$  vs  $h\nu$  plots for varied CeO<sub>2</sub>, c, d) Mott-Schottky plot of CeO<sub>2</sub>-900/6 and Fe<sub>2</sub>O<sub>3</sub>-900/6 at the frequency of 1 kHz.

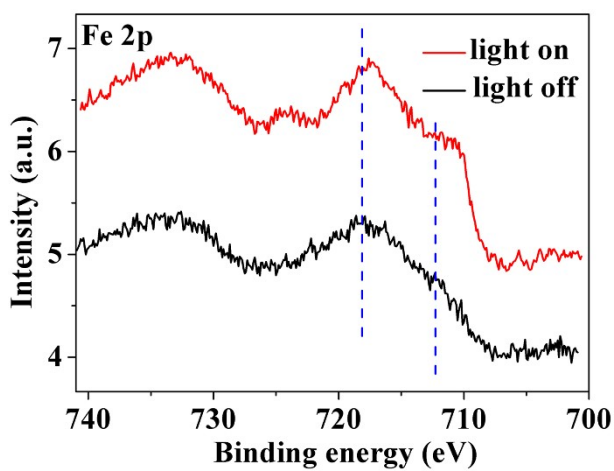

Fig. S16 High-resolution Fe 2p XPS spectra of 1:3 Fe/CeO<sub>2</sub>-900/6 with and without illumination respectively.

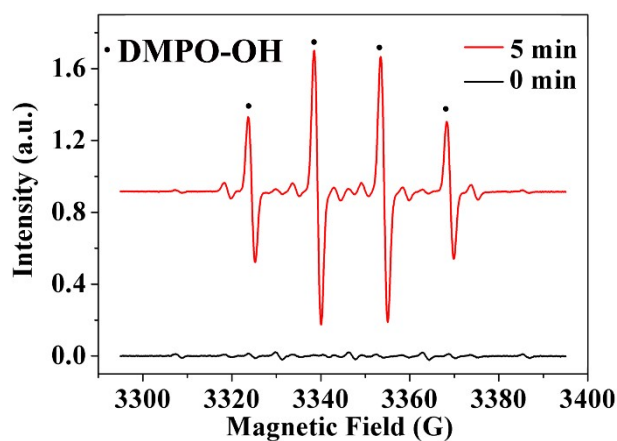

Fig. S17 ESR spectra of the reaction system.

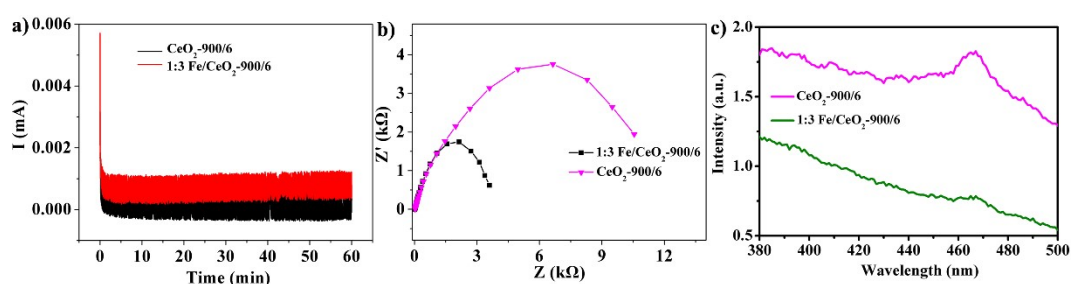

Fig. S18 a) The photocurrent curves, b) EIS spectra and c) PL spectra of 1:3 Fe/CeO<sub>2</sub>-900/6 and CeO<sub>2</sub>-900/6.

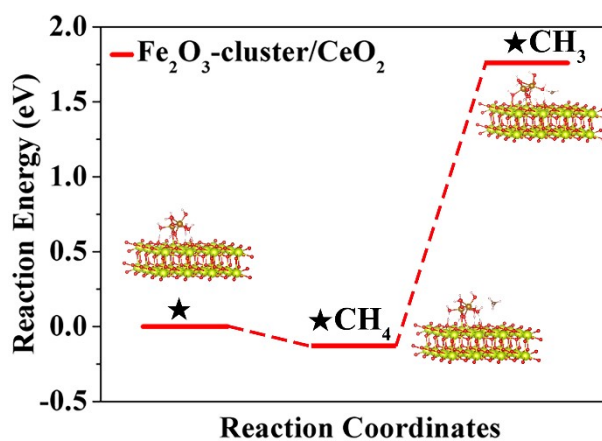

Fig. S19 DFT energy profile for CH<sub>4</sub> adsorption and activation to  $\text{CH}_3$  over Fe<sub>2</sub>O<sub>3</sub>-cluster/CeO<sub>2</sub> respectively.

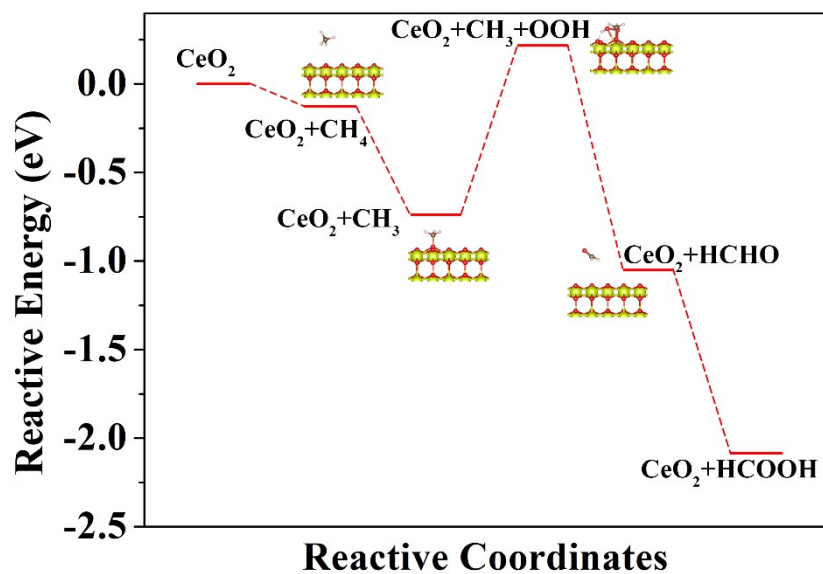

Fig. S20 Proposed reaction routes and DFT energy profiles for CH<sub>4</sub> photooxidation to C1 products over CeO<sub>2</sub>.

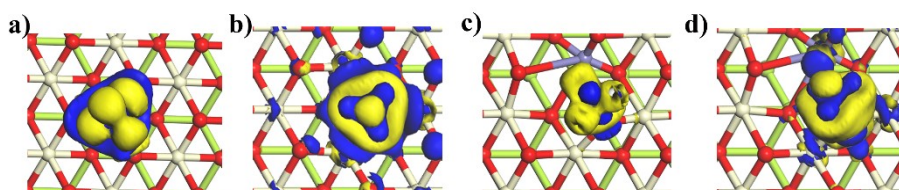

Fig. S21 DCD maps of CeO<sub>2</sub>+CH<sub>4</sub>, CeO<sub>2</sub>+CH<sub>3</sub>, \*CH<sub>4</sub> and \*CH<sub>3</sub> respectively. The isosurface value is 0.008 e Å<sup>-3</sup>.

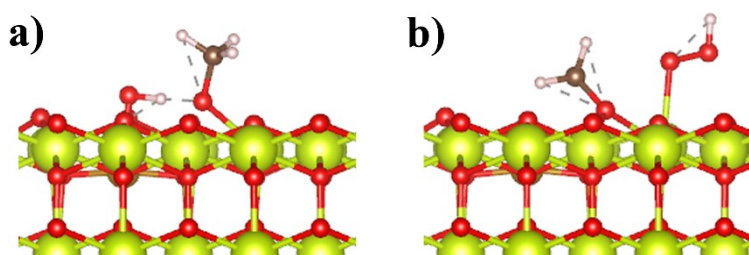

Fig. S22 Optimized structures of \*CH<sub>3</sub>+OH<sub>Fe</sub> and \*CH<sub>3</sub>+OOH<sub>Ce</sub> respectively.

## Part S1 Details of the instruments and equipment used for catalysts characterization.

Morphologies and crystal structures of the catalysts were characterized using scanning

electron microscopy (SEM, S-4800, Hitachi, Japan), transmission electron microscopy (TEM, JEOL JEM-2100, Japan) and powder X-ray diffraction (XRD) spectra (Rigaku Industrial Corporation, Osaka, Japan). Fourier transform infrared (FTIR) spectra and UV-vis diffuse reflectance spectra (DRS) were recorded on the Vertex 80/Hyperion 2000 spectrometer (Bruker, Germany) and UV-vis absorption spectrometer (UV-vis DRS, U-4100, Shimadzu, Japan) respectively. Elemental surface chemical states and valence-band spectra were characterized using X-ray photoelectron spectroscopy (XPS, ESCALAB 250Xi, Thermo Scientific Inc., USA). <sup>1</sup>H nuclear magnetic resonance (HNMR) spectra were measured on a JNM-ECZ400S NMR spectrometer (Japan). Specific surface areas and pore sizes were obtained via an the Quantachrome Instrument (USA). Electron paramagnetic resonance (EPR) spectra were measured on a EPR spectrometer (EMX plus 10/12, Bruker, Germany).

### **Part S2 DFT computational details.**

All the density functional theory (DFT) calculations were carried out using the Dmol<sup>3</sup> code of Materials Studio 2019.<sup>1</sup> The exchange-correlation potential was calculated by the generalized gradient approximation (GGA) with the Perdew-Burke-Ernzerhof (PBE) functional.<sup>1</sup> The interactions between electronics and ions were described using the DFT semi-core pseudo potentials (DSPPs) core treatment, which replaces core electrons by a single effective potential and introduces some degree of relativistic correction into the core. The geometry optimization convergences tolerance was set to 0.002 Ha·Å<sup>-1</sup> (1 Ha = 27.21 eV), and the total energy convergences was set to 10<sup>-6</sup> Ha. The Brillouin zone was sampled with 2×2×1 Monkhorst-Pack k-point mesh, and a smearing of 0.005 Ha was applied to speed up electronic convergence. The 2-layer 2×2 supercell of CeO<sub>2</sub> (1 1 1) slab with 96 atoms (six atomic layers) was used to build the calculation models. Spin polarization was also applied to our calculations, and the real space cutoff radius was maintained as 5.0 Å.<sup>2,3</sup> The Ce and O atoms in the bottom three layers were fixed, and the other atoms were fully relaxed. The thickness of the vacuum layer in multi-layer calculation models was set to 20 Å to avoid the unwanted interaction between the slab and its period images.

## References

- 1 Y. Jiang, C. Lai, Q. Li, W. Gan, L. Yang, Z. Yang, R. Lin, X. Wang, X. Zhu, The poisoning effect of KCl and K<sub>2</sub>O on CeO<sub>2</sub>-TiO<sub>2</sub> catalyst for selective catalytic reduction of NO with NH<sub>3</sub>, *Fuel*. 280 (2020) 118638.
- 2 X. Song, P. Ning, C. Wang, K. Li, L. Tang, X. Sun, Catalytic hydrolysis of COS over CeO<sub>2</sub> (110) surface: A density functional theory study, *Appl. Surf. Sci.* 414 (2017) 345-352.
- 3 H. Tang, T. Ju, Y. Dai, M. Wang, Y. Ma, M. Wang, G. Zheng, Ultrahigh efficiency CH<sub>4</sub> photocatalytic conversion to C1 liquid products over cheap and vacancy-rich CeO<sub>2</sub> at 30 °C, *J. Mater. Chem. A*. 10 (2022) 18978-18988.
